# Supplementary material
Source: PubMed Central journal article supplement (PMC3277220)
Supplement: mt2011266x1.pdf [file mt2011266x1.pdf]

# Figure S1. Examples of Southern analyses

## a. hiPS cells / *HPRT1* knock-out

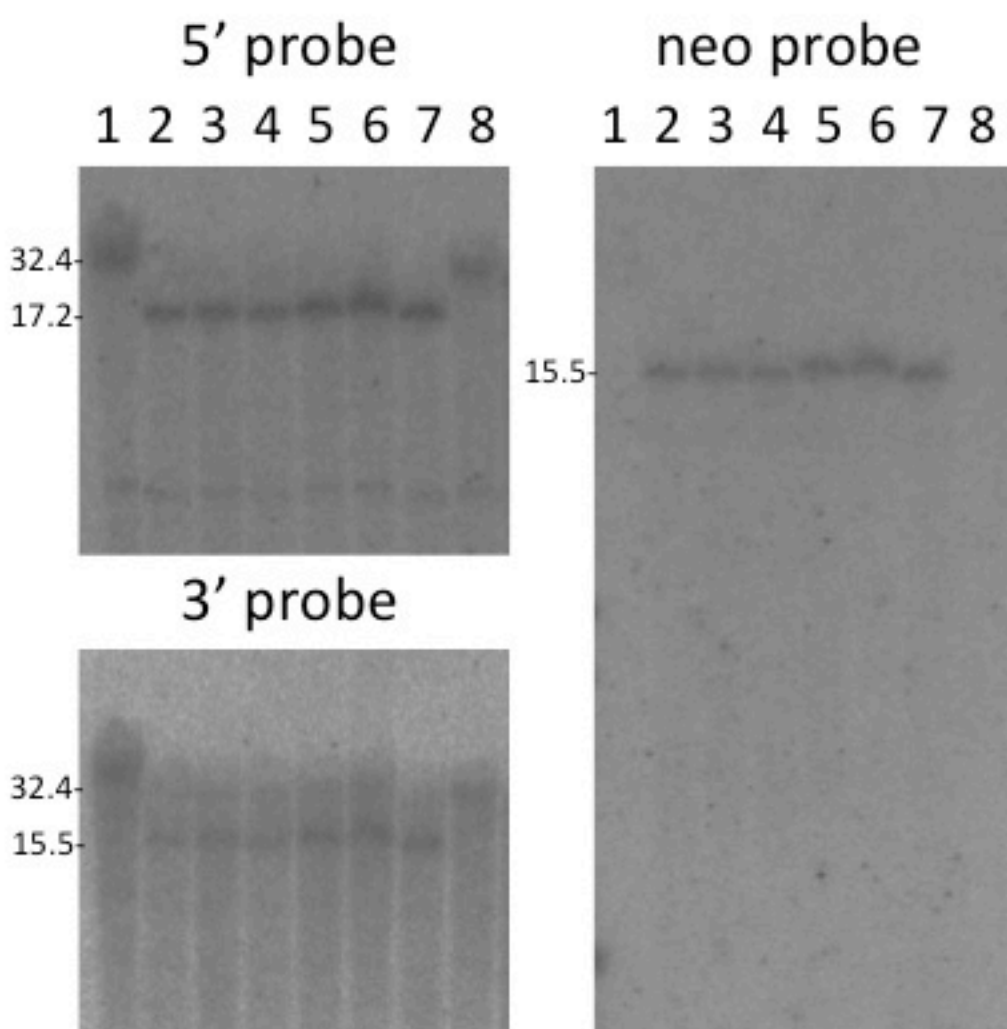

| lane | clone  | PCR | Southern |    |     | HR |
|------|--------|-----|----------|----|-----|----|
|      |        |     | 5'       | 3' | neo |    |
| 1    | WT     | ×   | ×        | ×  | ×   |    |
| 2    | G1-12  | ○   | ○        | ○  | ○   | ○  |
| 3    | G1-48  | ○   | ○        | ○  | ○   | ○  |
| 4    | G1-121 | ○   | ○        | ○  | ○   | ○  |
| 5    | G1-175 | ○   | ○        | ○  | ○   | ○  |
| 6    | G1-183 | ○   | ○        | ○  | ○   | ○  |
| 7    | H1-12  | ○   | ○        | ○  | ○   | ○  |
| 8    | WT     | ×   | ×        | ×  | ×   |    |

WT : parental cell line

G1-12, 48, 121, 175, 183, H1-12 :  
accurate homologous recombinants

## b. hiPS cells / *LIG1* knock-out

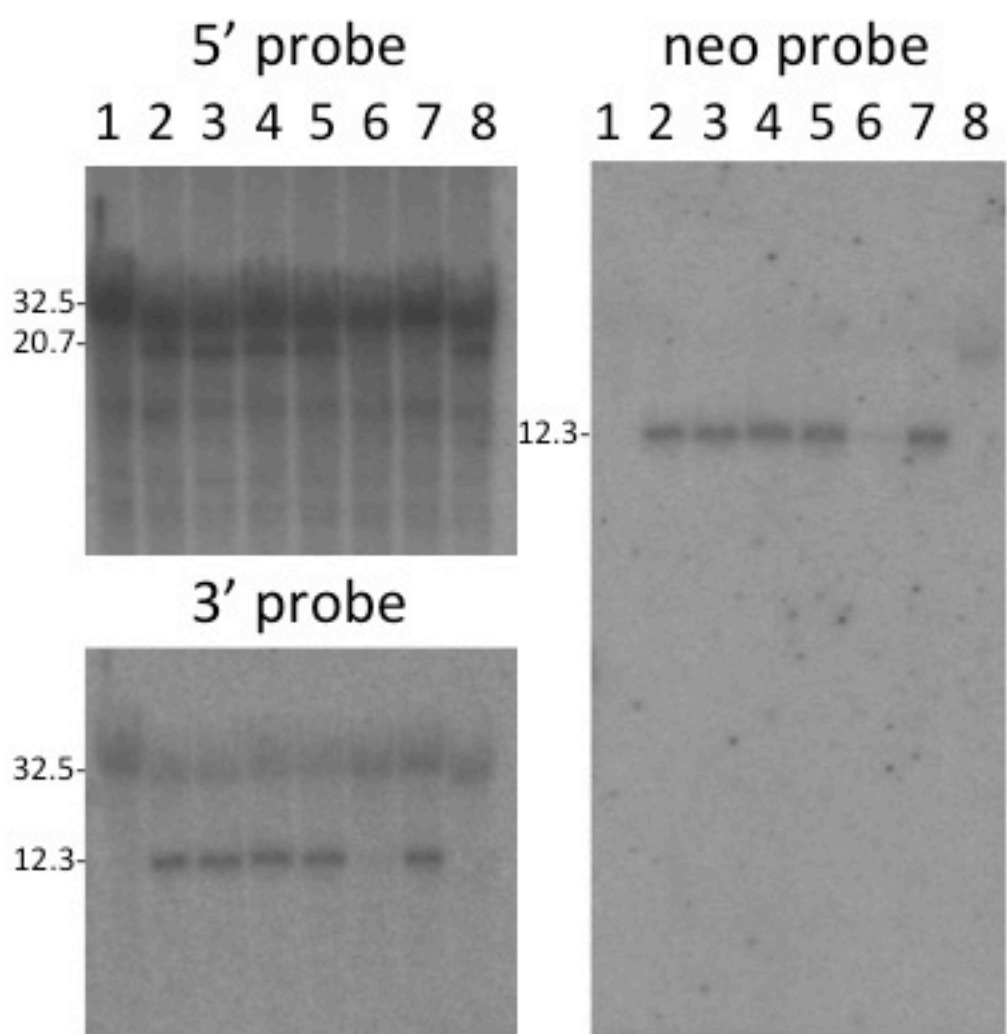

| lane | clone | PCR |    | Southern |    |     | HR      |
|------|-------|-----|----|----------|----|-----|---------|
|      |       | 5'  | 3' | 5'       | 3' | neo |         |
| 1    | WT    | ×   | ×  | ×        | ×  | ×   |         |
| 2    | 4     | ○   | ○  | ○        | ○  | ○   | ○       |
| 3    | 16    | ○   | ○  | ○        | ○  | ○   | ○       |
| 4    | 45    | ○   | ○  | ○        | ○  | ○   | ○       |
| 5    | 69    | ○   | ○  | ○        | ○  | ○   | ○       |
| 6    | 98    | ○   | ○  | ×        | ×  | ×   | ×       |
| 7    | 8     | ×   | ○  | ×        | ○  | ○   | 3' only |
| 8    | 120   | ○   | ×  | ○        | ×  | ×   | 5' only |

WT : parental cell line

#4, 16, 45, 69 : accurate homologous recombinants  
 #98 : inaccurate homologous recombinants  
 (positive PCR results)  
 #8, 120 : inaccurate homologous recombinants  
 (only one side is positive by PCR)

# Figure S1. Examples of Southern analyses

## c. hiPS cells / *LIG3* knock-out

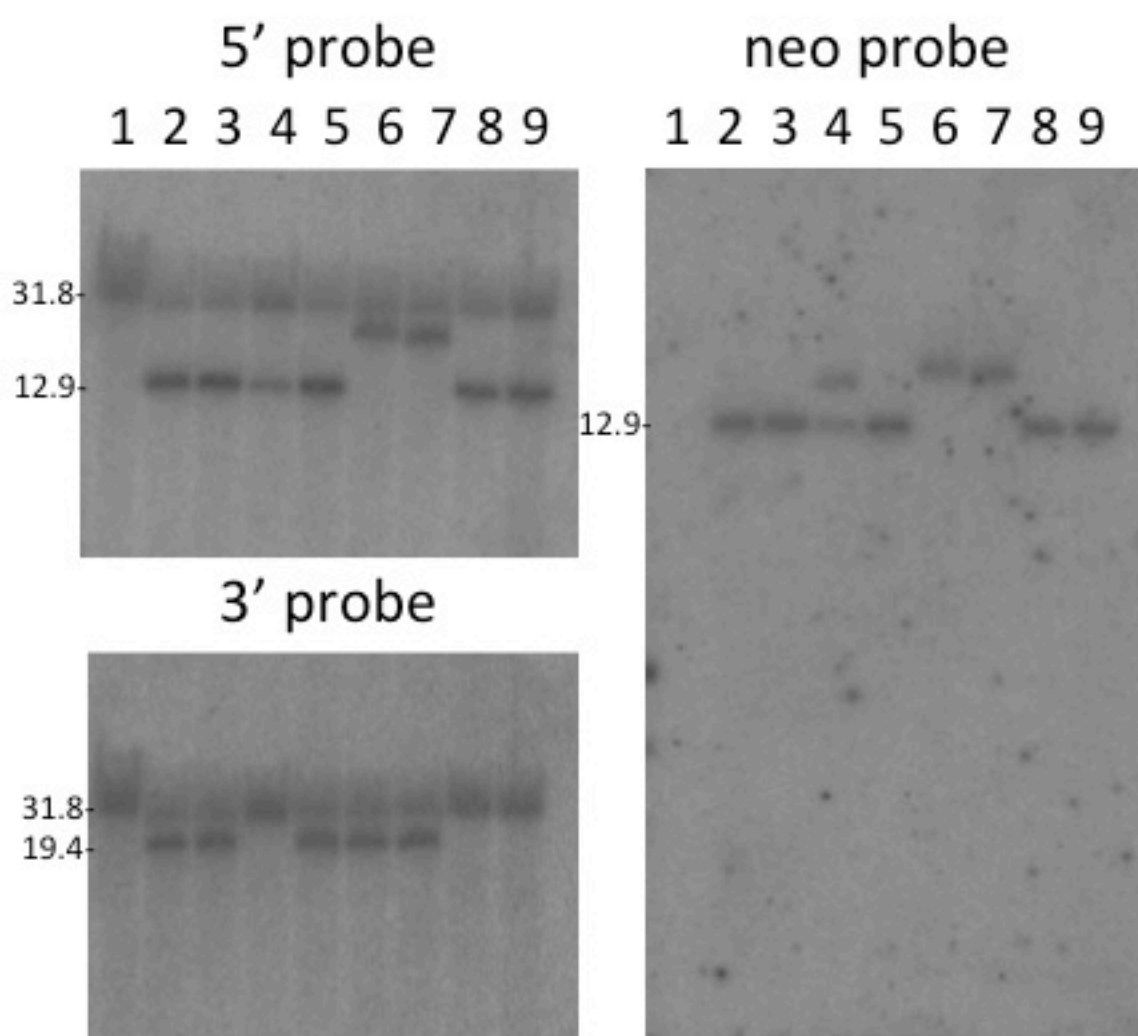

| lane | clone | PCR |    | Southern |    |     | HR     |
|------|-------|-----|----|----------|----|-----|--------|
|      |       | 5'  | 3' | 5'       | 3' | neo |        |
| 1    | WT    | ×   | ×  | ×        | ×  | ×   |        |
| 2    | 3     | ○   | ○  | ○        | ○  | ○   | ○      |
| 3    | 72    | ○   | ○  | ○        | ○  | ○   | ○      |
| 4    | 110   | ○   | ×  | ○        | ×  | ○   | 5'only |
| 5    | 180   | ○   | ○  | ○        | ○  | ○   | ○      |
| 6    | 100   | ×   | ○  | ×        | ○  | ○   | 3'only |
| 7    | 123   | ×   | ○  | ×        | ○  | ○   | 3'only |
| 8    | 166   | ○   | ×  | ○        | ×  | ○   | 5'only |
| 9    | 177   | ○   | ×  | ○        | ×  | ○   | 5'only |

WT : parental cell line

#3, 72, 180 : accurate homologous recombinants

#100, 110, 123, 166, 177 : inaccurate homologous recombinants (only one side is positive by PCR)

#110 has additional random integration.

## d. hiPS cells / *KU80* knock-out

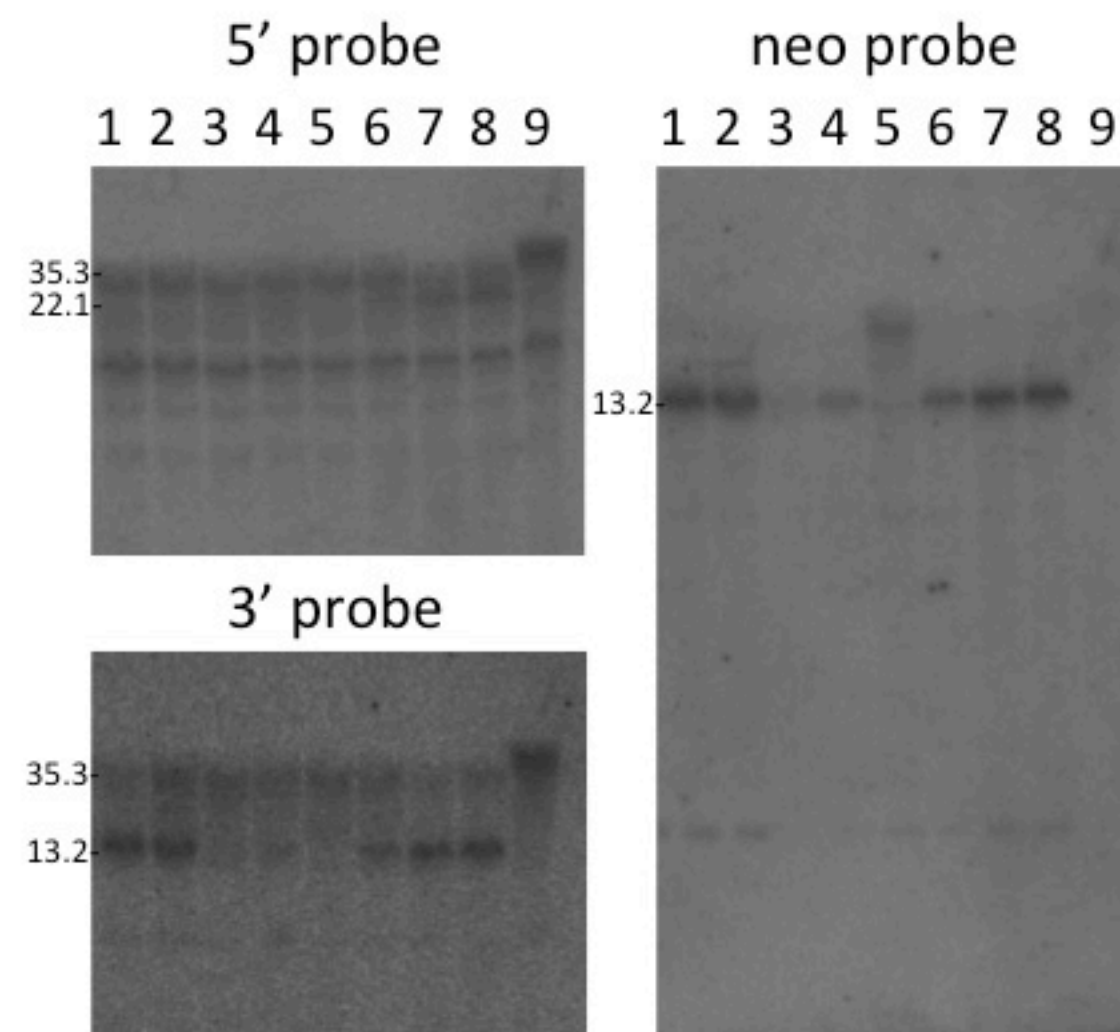

| lane | clone | PCR |    | Southern |    |     | HR     |
|------|-------|-----|----|----------|----|-----|--------|
|      |       | 5'  | 3' | 5'       | 3' | neo |        |
| 1    | 263   | ×   | ○  | ×        | ○  | ○   | 3'only |
| 2    | 283   | ×   | ○  | ×        | ○  | ○   | 3'only |
| 3    | 171   | ×   | ×  | ×        | ×  | ×   | ×      |
| 4    | 1     | ×   | ×  | ×        | ×  | ×   | ×      |
| 5    | 251   | ×   | ×  | ×        | ×  | ○   | ×      |
| 6    | 201   | ○   | ○  | ○        | ○  | ○   | ○      |
| 7    | 111   | ○   | ○  | ○        | ○  | ○   | ○      |
| 8    | 61    | ○   | ○  | ○        | ○  | ○   | ○      |
| 9    | WT    | ×   | ×  | ×        | ×  | ×   |        |

WT : parental cell line

#61, 111, 201 : accurate homologous recombinants

#263, 283 : inaccurate homologous recombinants (only one side is positive by PCR)

#251 : random chromosomal integrant

# Figure S1. Examples of Southern analyses

## e. hiPS cells / *HB9*-GFP knockin

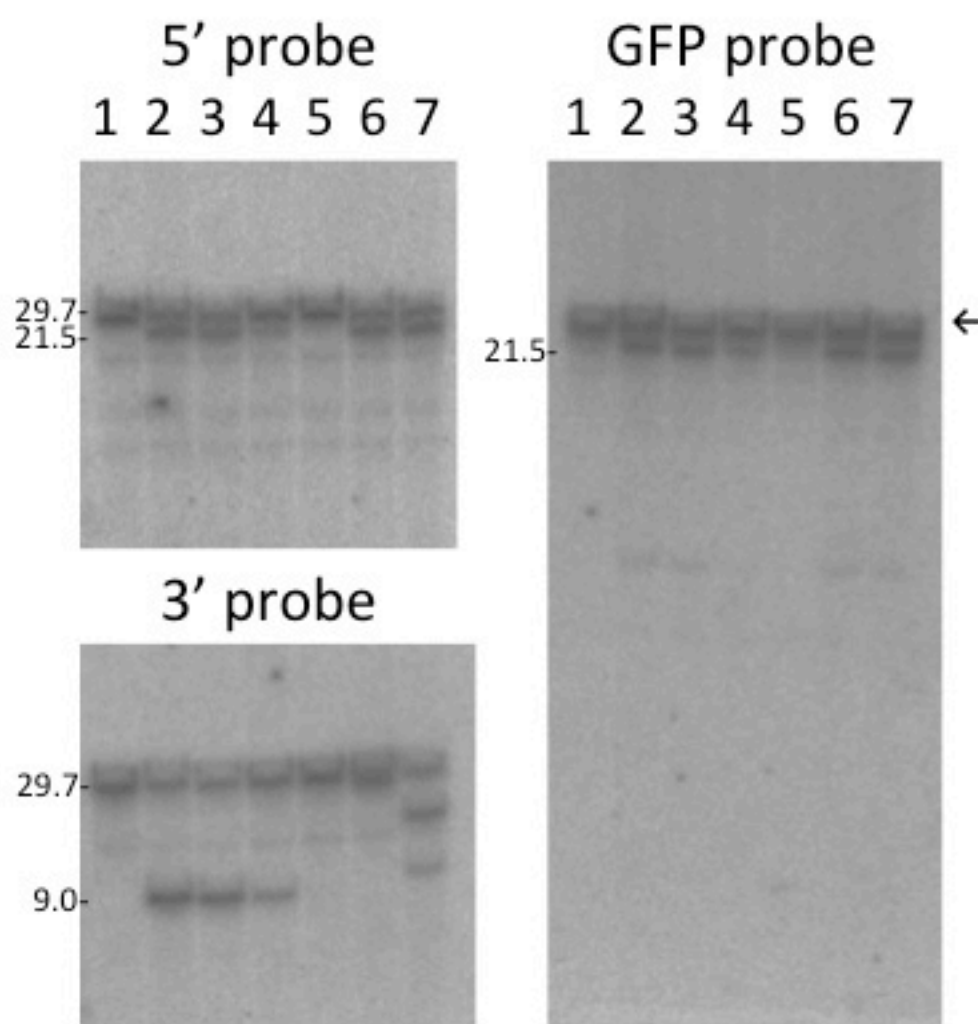

| lane | clone | PCR |    | Southern |    |     | HR     |
|------|-------|-----|----|----------|----|-----|--------|
|      |       | 5'  | 3' | 5'       | 3' | GFP |        |
| 1    | WT    | ×   | ×  | ×        | ×  | ×   |        |
| 2    | 24    | ○   | ○  | ○        | ○  | ○   | ○      |
| 3    | 72    | ○   | ○  | ○        | ○  | ○   | ○      |
| 4    | 130   | ○   | ○  | ○        | ○  | ○   | ○      |
| 5    | 181   | ×   | ×  | ×        | ×  | ×   | ×      |
| 6    | 242   | ○   | ○  | ×        | ○  | ○   | 5'only |
| 7    | 302   | ○   | ○  | ×        | ○  | ○   | 5'only |

WT : parental cell line

Arrow : endogenous GFP (pMXs-EGFP)

Only 5' PCR was performed.

#24, 72, 130 : accurate homologous recombinants

#242, 302 : inaccurate homologous recombinants

## f. hES cells / *HB9*-GFP knockin

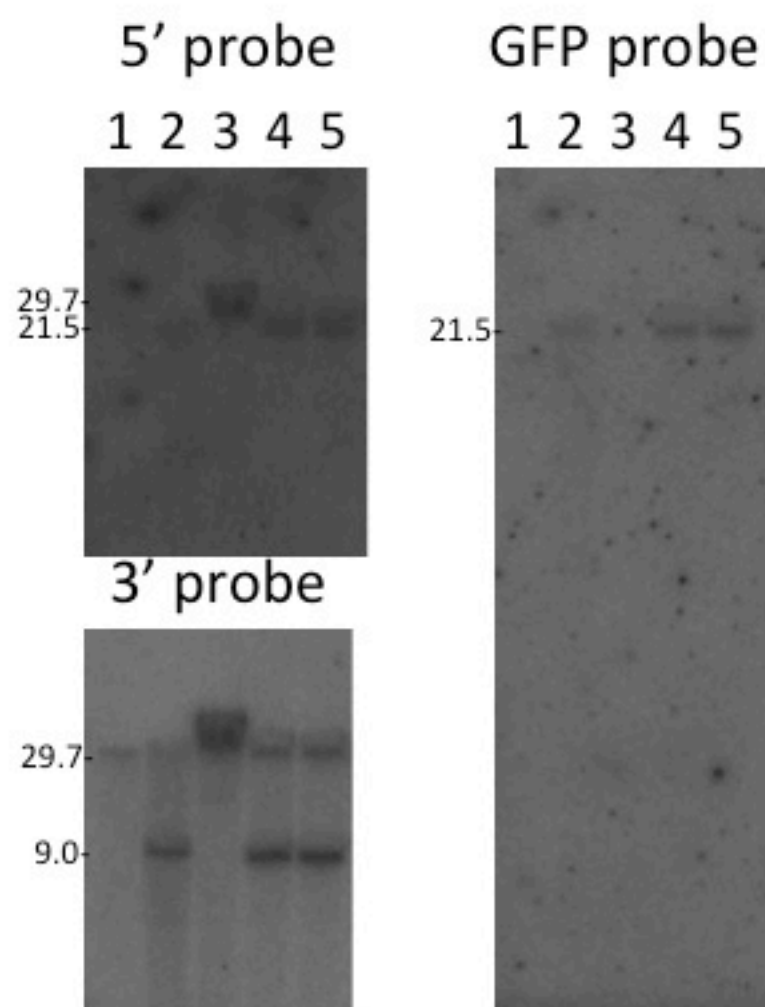

| lane | clone | PCR |    | Southern |    |     | HR |
|------|-------|-----|----|----------|----|-----|----|
|      |       | 5'  | 3' | 5'       | 3' | GFP |    |
| 1    | 43    | ×   | ×  | ×        | ×  | ×   | ×  |
| 2    | G10   | ○   | ○  | ○        | ○  | ○   | ○  |
| 3    | WT    | ×   | ×  | ×        | ×  | ×   |    |
| 4    | 28    | ○   | ○  | ○        | ○  | ○   | ○  |
| 5    | G1    | ○   | ○  | ○        | ○  | ○   | ○  |

WT : parental cell line

#28, G1, G10 : accurate homologous recombinants
