# Supplementary material
Source: PubMed Central journal article supplement (PMC3277220)

# Figure S2. Karyotype analyses

## KhES3-HB9-G1 P-12

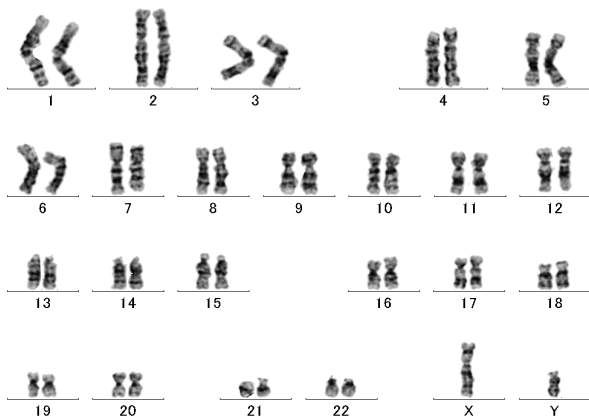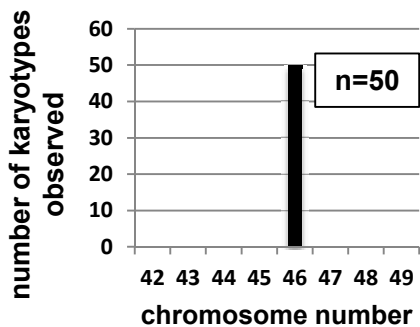

## KhES3-HB9-47 P-12

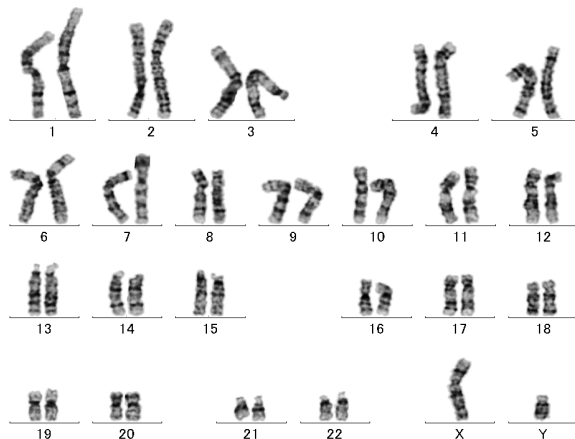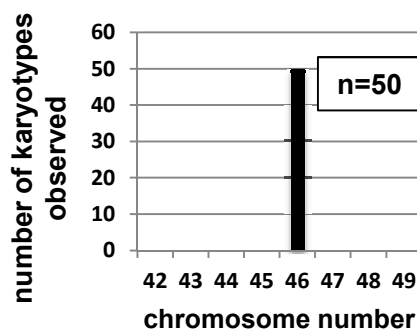

## KhES3-HPRT1- 5 P-10

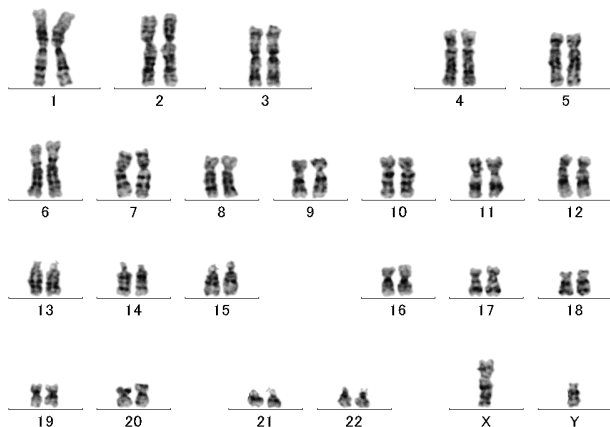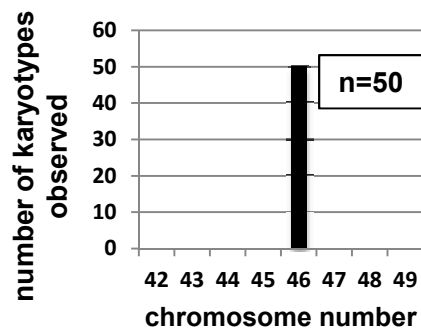

Supplement: mt2011266x2.pdf [file mt2011266x2.pdf]
